# Supplementary material for: Metrics that matter for assessing the ocean biological carbon pump
Source: PubMed Central journal article supplement — Proc Natl Acad Sci U S A. 2020 Apr 6;117(18):9679–87. doi: 10.1073/pnas.1918114117 (PMC7211944; doi:10.1073/pnas.1918114117), 2020-04-06
Supplement: pnas.1918114117.sapp.pdf [file pnas.1918114117.sapp.pdf]

# PNAS

www.pnas.org

Supplementary Information for

## **Metrics that matter for assessing the ocean biological carbon pump**

K. O. Buesseler<sup>1\*</sup>, P. W. Boyd<sup>2</sup>, E. E. Black<sup>3,4</sup> and D. A. Siegel<sup>5</sup>

<sup>1</sup> Department of Marine Chemistry & Geochemistry, Woods Hole Oceanographic Institution, Woods Hole, MA, 02543, USA.

<sup>2</sup> Institute for Marine and Antarctic Studies, University of Tasmania, Hobart, Tas., Australia

<sup>3</sup> Department of Oceanography, Dalhousie University, Halifax, NS, B3H 4R2, Canada.

<sup>4</sup> Division of Geochemistry, Lamont Doherty Earth Observatory, Palisades, NY, 10964, USA.

<sup>5</sup> Earth Research Institute and Department of Geography, University of California, Santa Barbara, CA, 93106-3060, USA.

\*Corresponding author: Ken O. Buesseler, kbuesseler@whoi.edu, 266 Woods Hole Road, MS25, Woods Hole, MA, 02543, USA, phone- 508-289-2309

### **This PDF file includes:**

Supplemental text- **Consideration of non-gravitational BCP pathways and increasing**

**POC flux vs. depth**

Figures S1 to S3

Table S1, S2

References

### **Consideration of non-gravitational BCP pathways and increasing POC flux vs. depth**

Our analyses are primarily focused on the gravitational settling of sinking POC, but the assessment of BCP efficiencies will also demand a common reference depth when considering the physically- or biologically-mediated injection pumps (PIPs) including the physical subduction of OM to depth, such as occurs with the mixed-layer pump and the subduction pump (see review by Boyd et al. (1)). For physical PIPs and questions related to longer term C sequestration, depths below the winter ML are appropriate upper boundaries (2), (3). For transport related to diel vertical migration (DVM) of zooplankton and larger organisms, as well as transport associated with their seasonal hibernation at depth, resulting in a C-rich “lipid” pump (4), the depth of DVM needs to be considered.

Several of the studies compiled here, show an increase in POC flux vs. depth ( $T_{100} > 1$  in Figure 2a). Could these PIPs cause this increase in particle flux with depth, or are there other possible explanations? In one model (5), a sensitivity analysis showed that if DVM accounted for more than 40% of the POC flux out of the Ez, a maximum, or bump in POC flux curve would be expected below the DVM reference depth, but this was not observed. This model assumed that POC consumed in the surface would be released as sinking POC flux (i.e. fecal pellets) at the depth of maximum daily DVM. However, the impact of DVM on POC flux, will also be set by the fraction of surface OM that is respired back in to inorganic C or released in dissolved or suspended organic C forms at depth, relative to new fecal material. Global models that consider DVM such as that by Archibald et al. (6), are sensitive to the fraction of zooplankton that participate in DVM. These authors found that while DVM accounts for 14% of global POC export from the base of the Ez, DVM has little impact on the magnitude of POC flux due to the large respiration terms, and dissolved OM losses below the Ez due to rapid migrations in their model.

Increases in POC flux with depth may also be due to transient changes in surface POC flux (7). For example, it would take 3-6 days for a particle exiting the surface to reach 300 m with sinking speeds of 50-100 m d<sup>-1</sup>, and so a rapidly declining surface flux over several days could result in a remnant higher POC flux peak at depth on this time scale. Another way to account for an increase in POC flux vs. depth is due to horizontal inputs of particles, for example from ocean margins (8), (9). Though more often reported for deep moored times-series traps, horizontal sources of POC need not be restricted to deeper depths. For example, Lam et al. (10) postulate a <200 m margin-derived lateral source of iron rich particles in the NE Pacific. Ollie et al. (11)

also postulate a shelf source for particles in their study of shallow trap fluxes, but this source did not lead to a POC flux increase with depth. Finally, a subsurface flux peak can also arise as an artifact when moored conical traps are used at depths <1000 m, where trap collection efficiencies are systematically too low (12), (13). Thus, the finding of POC flux increasing with depth can be attributed to several possible causes and is not uncommon in the upper TZ; however, it is impossible to fit a Martin curve to such POC flux data.

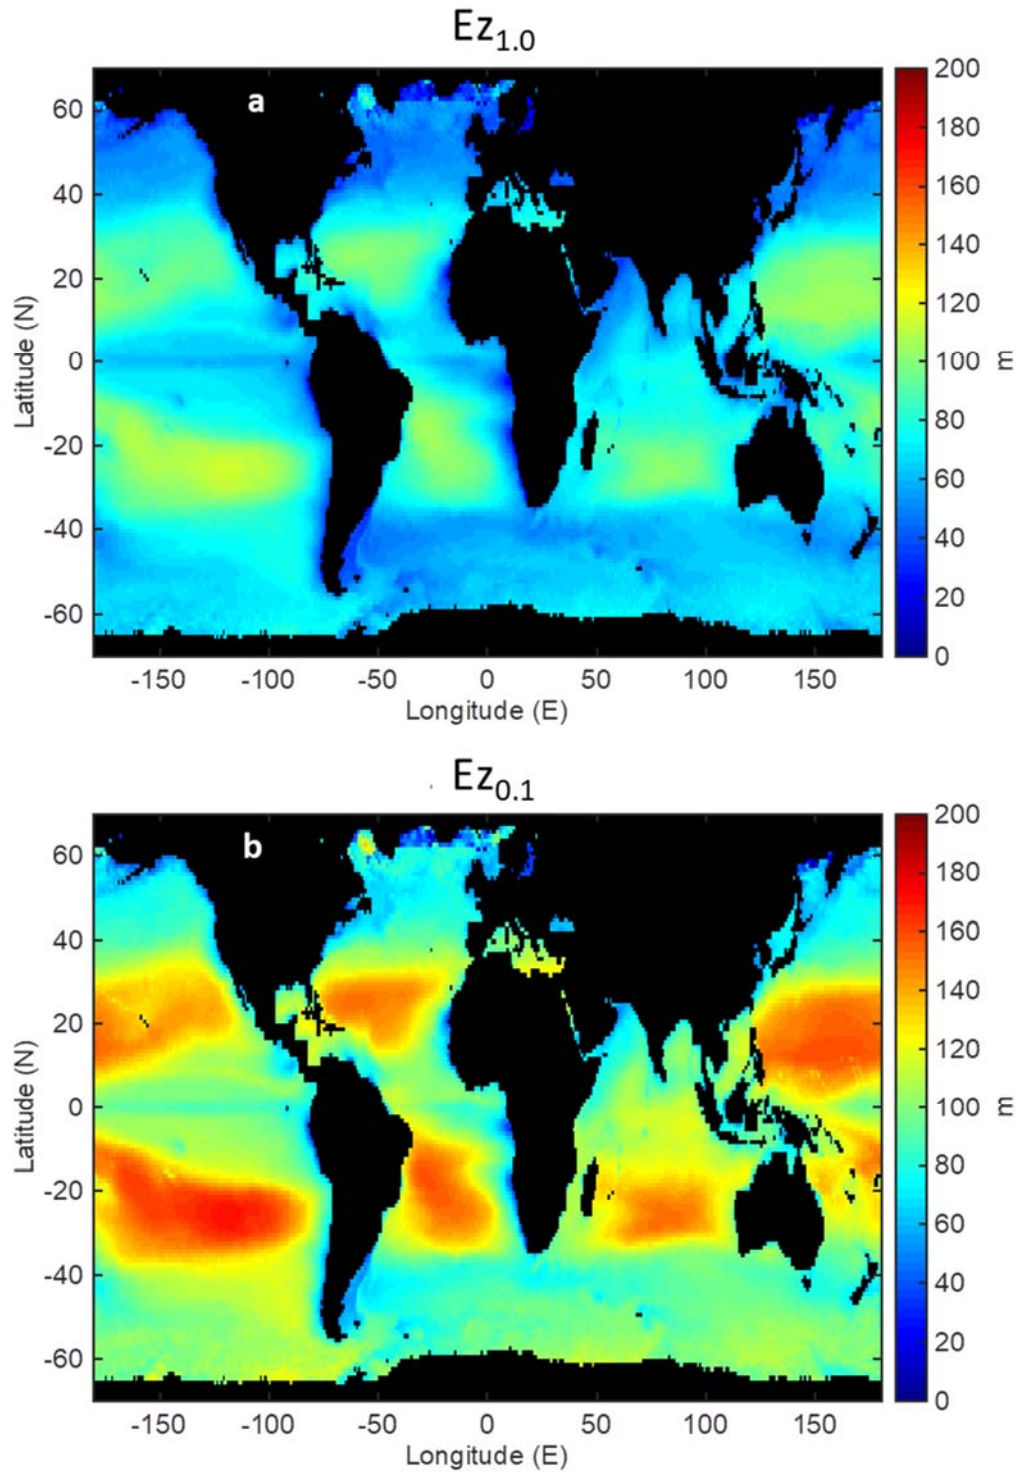

**Fig. S1.** Depth of 1% (a. upper) and 0.1% (b. lower) PAR (photosynthetically available radiation). Derived from Siegel et al. (14).

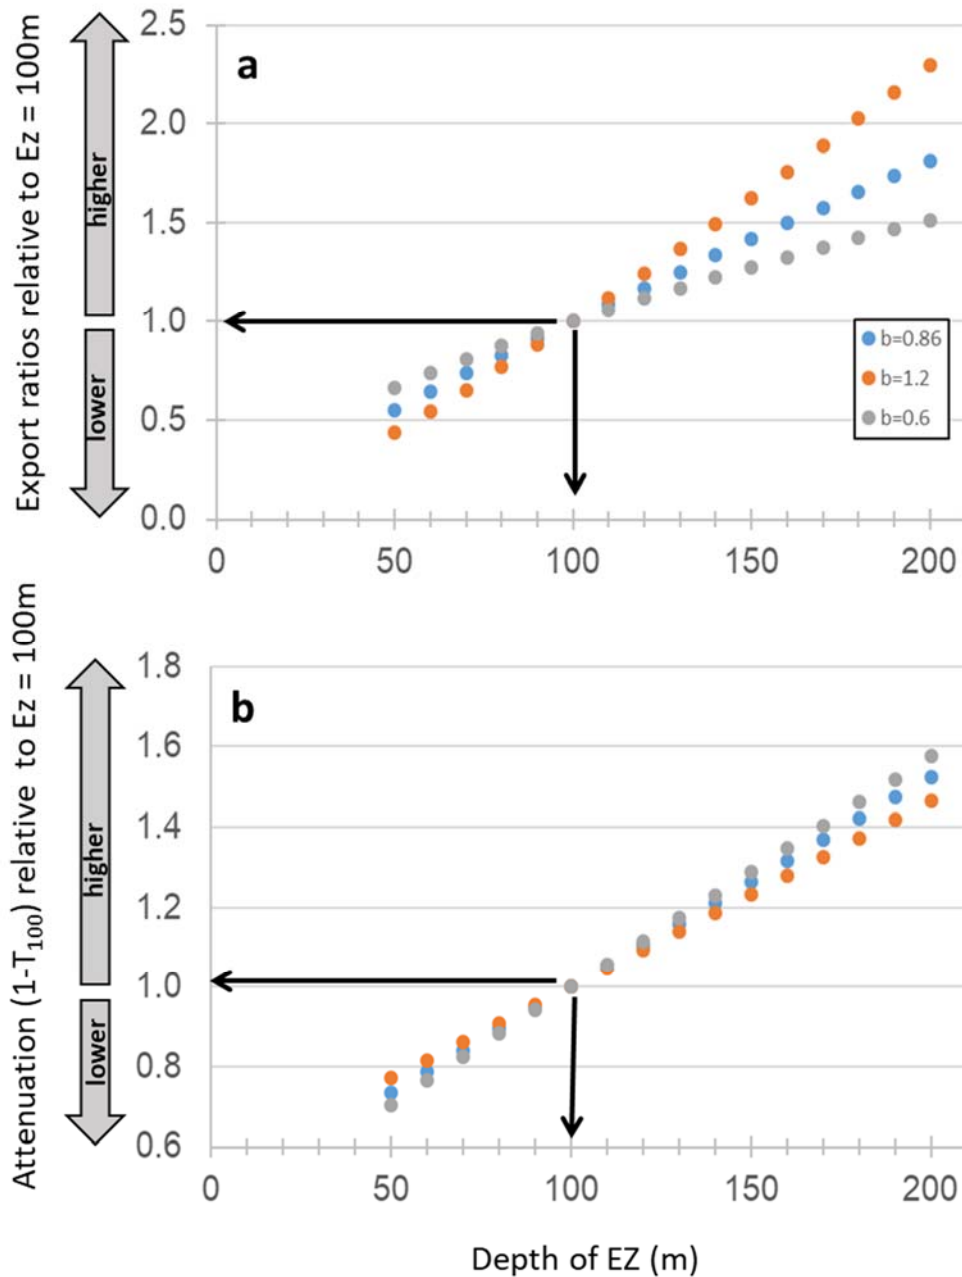

**Fig. S2a.** Sensitivity of the 100 m export ratio (100 m flux/NPP) for differing euphotic zone depths (x-axis) and attenuation ranges ( $b = 0.6$  to  $1.2$ ). For example, if flux were measured 100 m, the apparent  $E_z$  ratio would be lower by a factor of two, if the  $E_z$  was actually 50 m and  $b=0.86$ . If flux were measured at 100 m and the  $E_z$  was 200 m, the apparent  $E_z$  ratio would be more than two times higher. The sensitivity changes with different attenuation rates (i.e. with steeper POC flux attenuation, i.e. with a higher  $b$ , the impacts are greater). **Fig. S2b.** Same but for the change in attenuation (defined as  $1-T_{100}$ ) so that higher attenuation is a larger positive number. Differences are 25-30% lower 50% higher for attenuation if the flux were measured at 100 m, yet the  $E_z$  was actually 50 or 200 m, respectively.

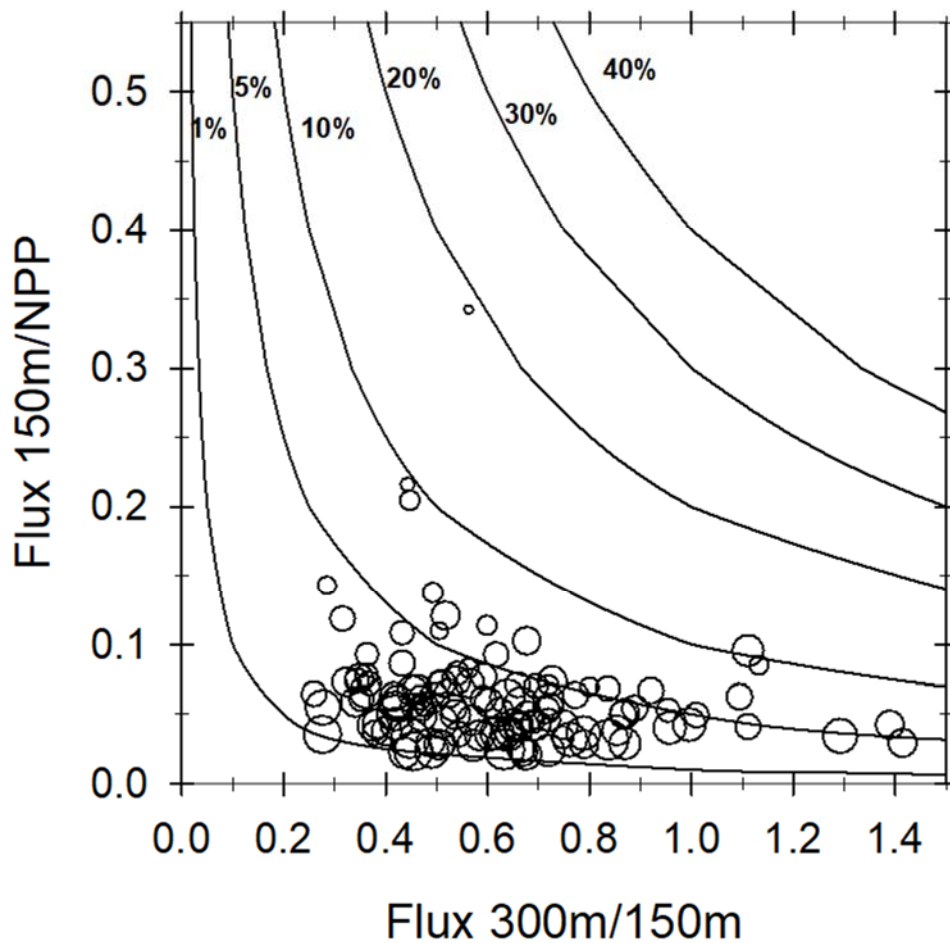

**Fig. S3.** Export ratio (y-axis) vs. flux transmission (x-axis) for 1990-2006 Bermuda Atlantic Time-Series sediment trap data from April-November when the 150 m traps are always deeper than the mixed layer. Here the export ratio is defined by the trap POC flux at 150 m/NPP and flux transmission by the measured flux at 300 m/150 m, with values >1.0 indicating an increasing flux vs. depth. The size of the circles is proportional to NPP as measured at BATS during the deployment. Data compiled from BATS web site (<http://bats.bios.edu/bats-data/>).

**S1. Table of common terms used to describe the biological carbon pump**

| <b>Nomenclature</b> | <b>Meaning</b>                                                                                                                      |
|---------------------|-------------------------------------------------------------------------------------------------------------------------------------|
| BCP efficiency      | General term for the sum of processes that determine magnitude of POC flux out of Ez and its attenuation in the upper twilight zone |
| Strength of the BCP | Magnitude of POC flux out of the Ez                                                                                                 |
| Export ratio        | POC flux at reference depth/NPP                                                                                                     |
| Ez-ratio            | POC flux at Ez/NPP                                                                                                                  |
| Transfer efficiency | Fraction of POC flux transported to some reference depth                                                                            |
| T <sub>100</sub>    | POC flux 100m below Ez/POC flux at Ez<br>T <sub>100</sub> = 1.0 = 100% transfer = zero POC flux loss                                |
| EZ <sub>1.0</sub>   | Euphotic zone with base defined by 1% PAR                                                                                           |
| EZ <sub>0.1</sub>   | Euphotic zone with base defined by 0.1% PAR                                                                                         |
| PPZ                 | Primary production zone = depth at which the signal from in-situ fluorescence sensors drops to 10% of the maximum above that depth  |
| TZ                  | Twilight Zone = base of Ez to 500 m (note other studies use 1000 m)                                                                 |

Table S2. Compilation of POC flux data

| ID#                                                        | Dates        | # sta's | ML (m) | Ez (m) | Type <sup>1</sup> | NPP <sup>2</sup> (mg m <sup>-2</sup> d <sup>-1</sup> ) | # depths | Depth range (m) | <sup>234</sup> Th                             |                                                     |                       |                               | Martin curve                                           |                    |                       | Original site name | SI Ref. #              |                               |
|------------------------------------------------------------|--------------|---------|--------|--------|-------------------|--------------------------------------------------------|----------|-----------------|-----------------------------------------------|-----------------------------------------------------|-----------------------|-------------------------------|--------------------------------------------------------|--------------------|-----------------------|--------------------|------------------------|-------------------------------|
|                                                            |              |         |        |        |                   |                                                        |          |                 | F at Ez (mg m <sup>-2</sup> d <sup>-1</sup> ) | F at Ez +100m (mg m <sup>-2</sup> d <sup>-1</sup> ) | Ez ratio <sup>3</sup> | T <sub>100</sub> <sup>4</sup> | F <sub>100</sub> (mg m <sup>-2</sup> d <sup>-1</sup> ) | b                  | Ez-ratio <sup>5</sup> |                    |                        | T <sub>100</sub> <sup>6</sup> |
| <b><sup>234</sup>Th BASED STUDIES</b>                      |              |         |        |        |                   |                                                        |          |                 |                                               |                                                     |                       |                               |                                                        |                    |                       |                    |                        |                               |
| <b>NW Pacific, 47°N 160°E</b>                              |              |         |        |        |                   |                                                        |          |                 |                                               |                                                     |                       |                               |                                                        |                    |                       |                    |                        |                               |
| 1                                                          | Jul/Aug-05   | 13      | 25     | 50     | 0.1%              | 530                                                    | 8 to 20  | surf to 400     | 133                                           | 68                                                  | 0.25                  | 0.51                          | 77                                                     | -0.79              | 0.15                  | 0.58               | K2-D1                  | (5)                           |
| 2                                                          | Jul/Aug-05   | 13      | 25     | 50     | 0.1%              | 365                                                    | 8 to 24  | surf to 400     | 39                                            | 25                                                  | 0.11                  | 0.64                          | 26                                                     | -0.61              | 0.07                  | 0.66               | K2-D2                  | (5)                           |
| <b>North Pacific Subtropical Gyre, 22°N 158°W</b>          |              |         |        |        |                   |                                                        |          |                 |                                               |                                                     |                       |                               |                                                        |                    |                       |                    |                        |                               |
| 3                                                          | Jun/Jul-04   | 19      | 50     | 125    | 0.1%              | 200                                                    | 4 to 10  | surf to 200     | 15                                            | 10                                                  | 0.07                  | 0.69                          | 23                                                     | -1.17              | 0.12                  | 0.44               | ALOHA                  | (5)                           |
| <b>NE Atlantic, 47°N 20°W</b>                              |              |         |        |        |                   |                                                        |          |                 |                                               |                                                     |                       |                               |                                                        |                    |                       |                    |                        |                               |
| 4                                                          | Apr/May-89   | 4       | 20     | 50     | 1.0%              | 1104                                                   | 8        | surf to 300     | 493                                           | 600                                                 | 0.45                  | 1.22                          | no fit                                                 |                    | no fit                |                    | JGOFS NABE             | (5)                           |
| <b>Equatorial Pacific, 0°N 140°W</b>                       |              |         |        |        |                   |                                                        |          |                 |                                               |                                                     |                       |                               |                                                        |                    |                       |                    |                        |                               |
| 5                                                          | Mar & Oct-92 | 2       | 40     | 120    | 0.1%              | 1300                                                   | 10       | surf to 375     | 26                                            | 17                                                  | 0.02                  | 0.65                          | 32                                                     | -1.03              | 0.02                  | 0.49               | EQPAC- spring/fall avg | (5)                           |
| <b>S. Ocean polar frontal zone, 61.5-65.5°S, 170°W</b>     |              |         |        |        |                   |                                                        |          |                 |                                               |                                                     |                       |                               |                                                        |                    |                       |                    |                        |                               |
| 6                                                          | Dec-97       | 4       | 22     | 30     | 1.0%              | 984                                                    | 7        | surf to 300     | 284                                           | 78                                                  | 0.29                  | 0.27                          | 116                                                    | -1.29              | 0.12                  | 0.41               | KIWI-7                 | (5)                           |
| 7                                                          | Jan-98       | 4       | 45     | 60     | 1.0%              | 1428                                                   | 7        | surf to 300     | 488                                           | 345                                                 | 0.34                  | 0.71                          | 394                                                    | -0.27              | 0.28                  | 0.83               | KIWI-8                 | (5)                           |
| 8                                                          | Feb-98       | 3       | 70     | 90     | 1.0%              | 300                                                    | 7        | surf to 300     | 127                                           | 105                                                 | 0.42                  | 0.83                          | no fit                                                 |                    | no fit <sup>7</sup>   |                    | KIWI-9                 | (5)                           |
| <b>NE Pacific subpolar, 50°N 145°W</b>                     |              |         |        |        |                   |                                                        |          |                 |                                               |                                                     |                       |                               |                                                        |                    |                       |                    |                        |                               |
| 9                                                          | May-96       | 1       | 60     | 60     | 0.1%              | 1020                                                   | 8        | surf to 400     | 31                                            | 8                                                   | 0.03                  | 0.26                          | 15                                                     | -1.05              | 0.01                  | 0.48               | OSP-May                | (5)                           |
| 10                                                         | Aug-96       | 2       | 40     | 40     | 0.1%              | 700                                                    | 8        | surf to 400     | 97                                            | 29                                                  | 0.14                  | 0.30                          | 43                                                     | -1.16              | 0.06                  | 0.45               | OSP-Aug                | (5)                           |
| <b>S. Ocean polar frontal zone<sup>8</sup>, 60°S 172°W</b> |              |         |        |        |                   |                                                        |          |                 |                                               |                                                     |                       |                               |                                                        |                    |                       |                    |                        |                               |
| 11                                                         | Jan/Feb-02   | 1       | 35     | 51     | 1.0%              | 600                                                    | 8        | surf to 150     | 36                                            | 10                                                  | 0.06                  | 0.27                          | 21                                                     | -0.31              | 0.04                  | 0.81               | SOFex-start            | (15)                          |
| 12                                                         | Jan/Feb-02   | 2       | 35     | 37     | 1.0%              | 900                                                    | 8        | surf to 150     | 77                                            | 107                                                 | 0.09                  | 1.39                          | no fit                                                 |                    | no fit                |                    | SOFex-day 10           | (15)                          |
| 13                                                         | Jan/Feb-02   | 3       | 35     | 29     | 1.0%              | 1620                                                   | 8        | surf to 150     | 72                                            | 130                                                 | 0.04                  | 1.80                          | no fit                                                 |                    | no fit                |                    | SOFex-day 20           | (15)                          |
| <b>North Atlantic Subtropical Gyre, 31°N 66°W</b>          |              |         |        |        |                   |                                                        |          |                 |                                               |                                                     |                       |                               |                                                        |                    |                       |                    |                        |                               |
| 14                                                         | Jun-04       | 17      | 40     | 140    | 1.0%              | 403                                                    | 10       | surf to 300     | 71                                            | 87                                                  | 0.17                  | 1.23                          | no fit                                                 |                    | no fit                |                    | EDDIES- I Cyclone C1   | (16)                          |
| 15                                                         | Aug-04       | 11      | 45     | 140    | 1.0%              | 594                                                    | 10       | surf to 300     | 23                                            | 25                                                  | 0.04                  | 1.07                          | no fit                                                 |                    | no fit                |                    | EDDIES- II Cyclone C1  | (16)                          |
| 16                                                         | Jul-05       | 18      | 20     | 140    | 1.0%              | 273                                                    | 10       | surf to 300     | 14                                            | 5                                                   | 0.05                  | 0.34                          | 17                                                     | -1.03              | 0.06                  | 0.49               | EDDIES- III MWE A4     | (16)                          |
| 17                                                         | Aug-05       | 18      | 30     | 140    | 1.0%              | 426                                                    | 10       | surf to 300     | 27                                            | 30                                                  | 0.06                  | 1.08                          | 29                                                     | -0.24 <sup>9</sup> | 0.07                  | 0.85               | EDDIES- IV MWE A4      | (16)                          |
| <b>Equatorial Pacific zonal transect, 15°S 77-78°W</b>     |              |         |        |        |                   |                                                        |          |                 |                                               |                                                     |                       |                               |                                                        |                    |                       |                    |                        |                               |
| 18                                                         | Nov/Dec-13   | 4       | 21     | 37     | PPZ               | 1524                                                   | 8 to 12  | surf to 200     | 589                                           | 103                                                 | 0.39                  | 0.21                          | 135                                                    | -1.53              | 0.10                  | 0.35               | EZPT shelf avg         | (17)                          |
| <b>Equatorial Pacific zonal transect, 15°S 79-105°W</b>    |              |         |        |        |                   |                                                        |          |                 |                                               |                                                     |                       |                               |                                                        |                    |                       |                    |                        |                               |
| 19                                                         | Nov/Dec-13   | 11      | 59     | 118    | PPZ               | 614                                                    | 8 to 12  | surf to 200     | 48                                            | 25                                                  | 0.08                  | 0.62                          | 41                                                     | -0.77              | 0.07                  | 0.60               | EZPT offshore avg      | (17)                          |
| <b>Equatorial Pacific zonal transect, 15°S 105-155°W</b>   |              |         |        |        |                   |                                                        |          |                 |                                               |                                                     |                       |                               |                                                        |                    |                       |                    |                        |                               |
| 20                                                         | Nov/Dec-13   | 20      | 60     | 169    | PPZ               | 561                                                    | 8 to 12  | surf to 200     | 13                                            | 11                                                  | 0.02                  | 0.82                          | 20                                                     | -0.58              | 0.04                  | 0.67               | EZPT gyre avg.         | (17)                          |



Table S2 cont.

SEDIMENT TRAPS

| <b>North Pacific Subtropical Gyre, 22°N 158°W</b> |        |   |    |     |      |     |    |            |     |      |      |      |       |       |      |      |                 |      |
|---------------------------------------------------|--------|---|----|-----|------|-----|----|------------|-----|------|------|------|-------|-------|------|------|-----------------|------|
| 21                                                | Sep-13 | 1 | 50 | 175 | 0.1% | 750 | 12 | 100 to 500 | 23  | 16   | 0.03 | 0.69 | 42.66 | -0.89 | 0.06 | 0.54 | ALOHA Sept 2013 | (18) |
| <b>Barents Sea, 74-76°N 31-32.5°E</b>             |        |   |    |     |      |     |    |            |     |      |      |      |       |       |      |      |                 |      |
| 22                                                | May-93 | 1 | 36 | 35  | 0.1% | 814 | 14 | 20 to 200  | 647 | 265  | 0.79 | 0.41 | 226   | -0.95 | 0.28 | 0.52 | Barents I       | (19) |
| 23                                                | May-93 | 1 | 14 | 40  | 0.1% | 913 | 14 | 20 to 200  | 425 | 330  | 0.47 | 0.78 | 328   | -0.32 | 0.36 | 0.80 | Barents II      | (19) |
| 24                                                | May-93 | 1 | 64 | 40  | 0.1% | 804 | 14 | 20 to 200  | 576 | 320  | 0.72 | 0.56 | 383   | -0.51 | 0.48 | 0.70 | Barents III     | (19) |
| 25                                                | May-93 | 1 | 61 | 60  | 0.1% | 314 | 14 | 20 to 200  | 303 | 215  | 0.96 | 0.71 | 216   | -0.39 | 0.69 | 0.76 | Barents IV      | (19) |
| <b>NW Spanish coast, 40°N 9.5°W</b>               |        |   |    |     |      |     |    |            |     |      |      |      |       |       |      |      |                 |      |
| 26                                                | Aug-98 | 3 | 35 | 60  | 0.1% | 316 | 8  | 40 to 200  | 114 | 62.7 | 0.36 | 0.55 | 44.1  | 0.56  | 0.14 | 1.47 | OMEX- Leg       | (11) |

Footnotes

- 1 Ez depths determined by different methods, including 1% and 0.1% PAR and PPZ (see text for details)
- 2 Net Primary Production determined via model or incubation methods per original reference
- 3 POC flux using <sup>234</sup>Th at Ez/NPP
- 4 POC flux using <sup>234</sup>Th 100m below Ez/POC flux at Ez
- 5 F<sub>100</sub> from Martin fit/NPP
- 6 F<sub>200</sub> from Martin fit/F<sub>100</sub>
- 7 No Martin fit as flux decreases than increases within upper 300m
- 8 Ocean Iron Fertilization (OIF) experiment
- 9 Martin fit 80-200m only as flux at 300m increases

## SI References

1. Boyd PW, Claustre H, Levy M, Siegel DA, & Weber T (2019) Multi-faceted particle pumps drive carbon sequestration in the ocean. *Nature* 568(7752):327-335.
2. Antia AN, *et al.* (2001) Basin-wide particulate carbon flux in the Atlantic Ocean: Regional export patterns and potential for atmospheric CO<sub>2</sub> sequestration. *Global Biogeochemical Cycles* 15(4):845-862.
3. Palevsky HI & Doney SC (2018) How Choice of Depth Horizon Influences the Estimated Spatial Patterns and Global Magnitude of Ocean Carbon Export Flux. *Geophysical Research Letters* 45(9):4171-4179.
4. Jónasdóttir SH, Visser AW, Richardson K, & Heath MR (2015) Seasonal copepod lipid pump promotes carbon sequestration in the deep North Atlantic. *Proceedings of the National Academy of Sciences* 112(39):12122-12126.
5. Buesseler KO & Boyd PW (2009) Shedding light on processes that control particle export and flux attenuation in the twilight zone. *Limnology and Oceanography* 54(4):1210-1232.
6. Archibald KM, Siegel DA, & Doney SC (2019) Modeling the Impact of Zooplankton Diel Vertical Migration on the Carbon Export Flux of the Biological Pump. *Global Biogeochemical Cycles* 33(2):181-199.
7. Giering SLC, *et al.* (2017) Particle flux in the oceans: Challenging the steady state assumption. *Global Biogeochemical Cycles* 31(1):159-171.
8. Hwang J, Manganini SJ, Montluçon DB, & Eglinton TI (2009) Dynamics of particle export on the Northwest Atlantic margin. *Deep Sea Research Part I: Oceanographic Research Papers* 56(10):1792-1803.
9. Hwang J, *et al.* (2015) Temporal and spatial variability of particle transport in the deep Arctic Canada Basin. *Journal of Geophysical Research: Oceans* 120(4):2784-2799.
10. Lam PJ, *et al.* (2006) Wintertime phytoplankton bloom in the subarctic Pacific supported by continental margin iron. *Global Biogeochemical Cycles* 20(1):GB1006.
11. Olli K, *et al.* (2001) Vertical flux of biogenic matter during a Lagrangian study off the NW Spanish continental margin. *Progress in Oceanography* 51(2):443-466.
12. Scholten JC, *et al.* (2001) Trapping efficiencies of sediment traps from the deep eastern North Atlantic: The <sup>230</sup>Th calibration. *Deep-Sea Research II* 48(10):2383-2408.
13. Yu E-F, *et al.* (2001) Trapping efficiency of bottom-tethered sediment traps estimated from the intercepted fluxes of <sup>230</sup>Th and <sup>231</sup>Pa. *Deep-Sea Research I* 48(3):865-889.
14. Siegel DA, *et al.* (2014) Global assessment of ocean carbon export by combining satellite observations and food-web models. *Global Biogeochemical Cycles* 28(3):181-196.
15. Buesseler, K.O., J.E. Andrews, S. Pike, M.A. Charette, L.E. Goldson, M.A. Brzezinski and V.P. Lance (2005). Particle export during the Southern Ocean Iron Experiment (SOFEX) (PDF) *Limnology and Oceanography*, 50, 311-327.
16. Buesseler, K.O., C. Lamborg, P. Cai, R. Escube, R. Johnson, S. Pike, P. Masque, D. McGillicuddy and E. Verdeny (2008). Particle fluxes associated with mesoscale eddies in the Sargasso Sea. *Deep-Sea Research II*, 55, 1426-1444.
17. Black EE, Buesseler KO, Pike SM, & Lam PJ (2018) <sup>234</sup>Th as a tracer of particulate export and remineralization in the southeastern tropical Pacific. *Marine Chemistry* 201:35-50.
18. Grabowski E, Letelier RM, Laws EA, & Karl DM (2019) Coupling carbon and energy fluxes in the North Pacific Subtropical Gyre. *Nature Communications* 10(1):1895.

19. Andreassen IJ & Wassmann P (1998) Vertical flux of phytoplankton and particulate biogenic matter in the marginal ice zone of the Barents Sea in May 1993. *Marine Ecology Progress Series* 170:1-14.
